# Supplementary material for: Hormesis Responses of Photosystem II in Arabidopsis thaliana under Water Deficit Stress
Source: MDPI journal article supplement (doi:10.3390/ijms24119573), 2023-05-31
Supplement: s1 [file s1]

# Hormesis Responses of Photosystem II in *Arabidopsis thaliana* under Water Deficit Stress

Ilektra Sperdouli<sup>1,2</sup>, Georgia Ouzounidou<sup>3</sup>, and Michael Moustakas<sup>1\*</sup>

**Table S1.** The measured chlorophyll fluorescence parameters with their definitions

| Parameter     | Definition                                                                                                                     | Calculation                                                                                                                                                                    |
|---------------|--------------------------------------------------------------------------------------------------------------------------------|--------------------------------------------------------------------------------------------------------------------------------------------------------------------------------|
| $F_v/F_m$     | Maximum efficiency of PSII photochemistry                                                                                      | $(F_m - F_o)/F_m$                                                                                                                                                              |
| $\Phi_{PSII}$ | Effective quantum yield of PSII photochemistry                                                                                 | $(F_m' - F_s)/F_m'$                                                                                                                                                            |
| $\Phi_{NPQ}$  | Quantum yield of regulated non-photochemical energy loss in PSII                                                               | $F_s/F_m' - F_s/F_m$                                                                                                                                                           |
| $\Phi_{NO}$   | Quantum yield of nonregulated energy loss in PSII                                                                              | $F_s/F_m$                                                                                                                                                                      |
| $F_v'/F_m'$   | Efficiency of the open PSII reaction centers                                                                                   | $(F_m' - F_o')/F_m'$                                                                                                                                                           |
| ETR           | Electron transport rate                                                                                                        | $\Phi_{PSII} \times PAR \times c \times abs$ , where PAR is the photosynthetically active radiation, c is 0.5, and abs is the total light absorption of the leaf taken as 0.84 |
| $qp$          | Photochemical quenching, representing the redox state of the plastoquinone pool and the fraction of open PSII reaction centers | $(F_m' - F_s)/(F_m' - F_o')$                                                                                                                                                   |
| EXCEE         | Excess excitation energy at PSII                                                                                               | $(F_v/F_m - \Phi_{PSII})/F_v/F_m$                                                                                                                                              |
| $1 - qp$      | Excitation pressure                                                                                                            | $1 - [(F_m' - F_s)/(F_m' - F_o')]$                                                                                                                                             |
